# Supplementary material for: Increased Cumulative Incidence of Dermatomyositis in Ulcerative Colitis: a Nationwide Cohort Study
Source: PubMed Central journal article supplement (PMC4914943; doi:10.1038/srep28175), 2016-06-21
Supplement: srep28175-s1.pdf [file srep28175-s1.pdf]

# **Increased Cumulative Incidence of Dermatomyositis in Ulcerative Colitis: a**

## **Nationwide Cohort Study**

Chia-Chun Tseng<sup>1,2</sup>, Shun-Jen Chang<sup>3,\*</sup>, Wei-Ting Liao<sup>4</sup>, Ya-Ting Chan<sup>3</sup>, Wen-Chan Tsai<sup>5</sup>, Tsan-Teng Ou<sup>5</sup>, Cheng-Chin Wu<sup>5</sup>, Wan-Yu Sung<sup>5,6</sup>, Ming-Chia Hsieh<sup>7,8</sup>,  
Jeng-Hsien Yen<sup>5,6,9,\*</sup>

<sup>1</sup>Graduate Institute of Clinical Medicine, College of Medicine, Kaohsiung Medical University, Kaohsiung, Taiwan

<sup>2</sup>Department of Internal Medicine, Kaohsiung Municipal Ta-Tung Hospital, Kaohsiung, Taiwan

<sup>3</sup>Department of Kinesiology, Health and Leisure Studies, National University of Kaohsiung, Kaohsiung, Taiwan

<sup>4</sup>Department of Biotechnology, College of Life Science, Kaohsiung Medical University, Kaohsiung, Taiwan

<sup>5</sup>Division of Rheumatology, Department of Internal Medicine, Kaohsiung Medical University Hospital, Kaohsiung, Taiwan

<sup>6</sup>Graduate Institute of Medicine, College of Medicine, Kaohsiung Medical University, Kaohsiung, Taiwan

<sup>7</sup>Division of Endocrinology and Metabolism, Department of Internal Medicine, Changhua Christian Hospital, Changhua, Taiwan

<sup>8</sup>Graduate Institute of Integrated Medicine, China Medical University, Taichung,

Taiwan

<sup>9</sup>Institute of Biomedical Sciences, National Sun Yat-sen University, Kaohsiung,

Taiwan

\*Correspondence and requests for materials should be addressed to S.-J.C. (email:

changsj1104@gmail.com) or J.-H.Y. (email: jehsye@kmu.edu.tw).

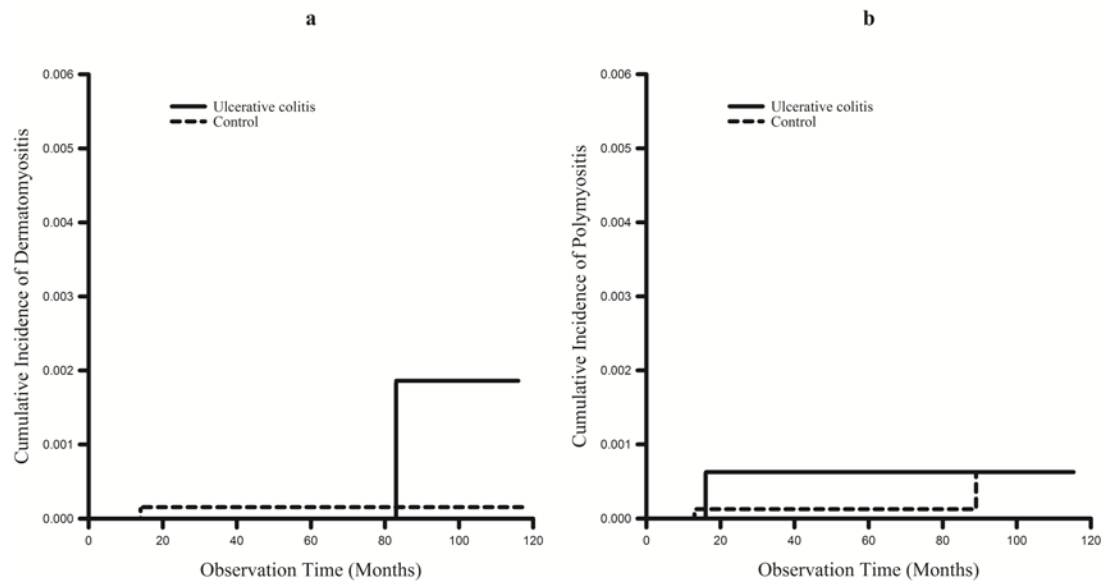

**Supplementary Figure 1.** Cumulative incidence of DM and PM in men. **(a)**The cumulative incidence of DM in men was higher in UC patients than in control subjects, but the difference was not statistically significant ( $p=0.245$ , estimated by the log-rank test). **(b)**The cumulative incidence of PM in men was comparable between UC patients and control subjects ( $p=0.484$ , estimated by the log-rank test).

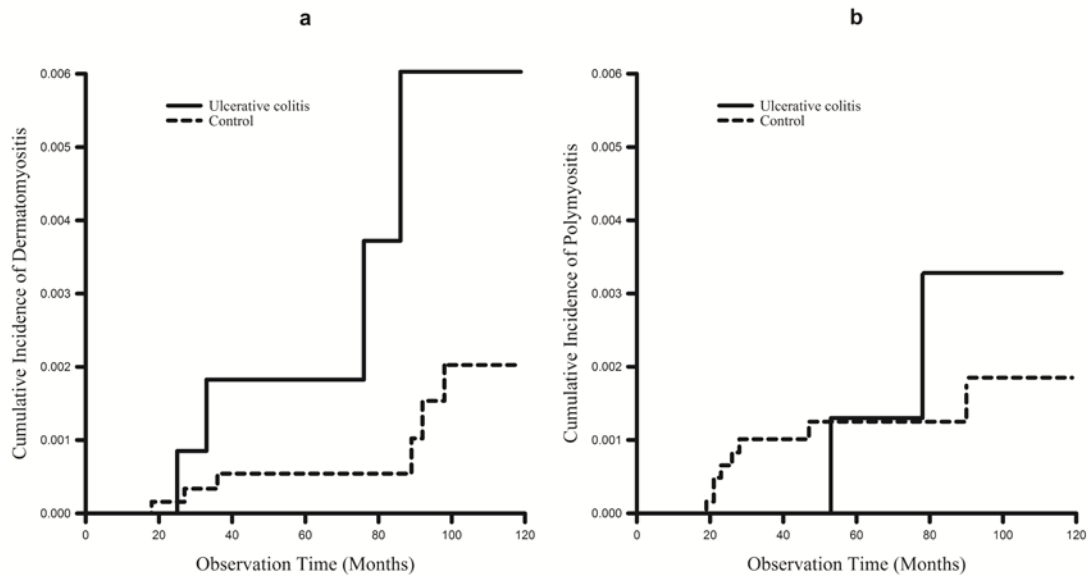

**Supplementary Figure 2.** Cumulative incidence of DM and PM in women. **(a)** The cumulative incidence of DM in women was higher in UC patients than in control subjects ( $p=0.044$ , estimated by the log-rank test). **(b)** The cumulative incidence of PM in women was comparable between UC patients and control subjects ( $p=0.784$ , estimated by the log-rank test).
